# Supplementary material for: Vitamin D receptor gene is epigenetically altered and transcriptionally up-regulated in multiple sclerosis
Source: PubMed Central journal article supplement (PMC5371344; doi:10.1371/journal.pone.0174726), 2017-03-29
Supplement: pone.0174726.s001.pdf [file pone.0174726.s001.pdf]

S1 Fig. Correlation between VDR mRNA expression and biological variables.

A.

Correlation VDR expression & lymphocyte

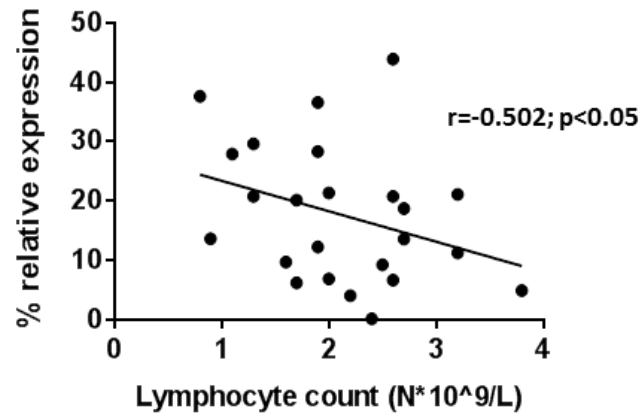

B.

Correlation VDR expression & calcidiol

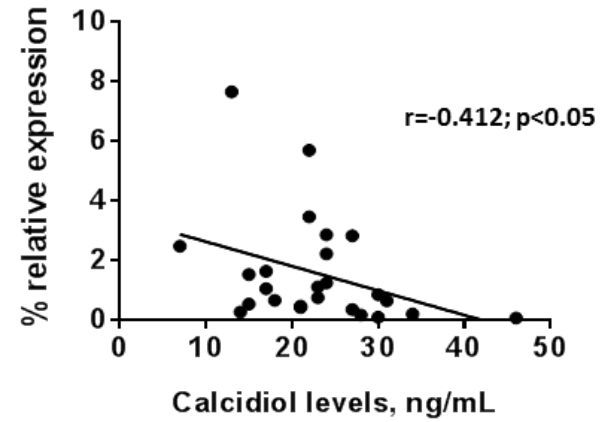

The dot-plot charts A and B show an inverse moderate correlation of *VDR* mRNA expression with lymphocyte count (N\*10<sup>9</sup>/L) (A) and serum vitamin D (calcidiol) levels, ng/mL (B).
