# Supplementary material for: Vitamin D receptor gene is epigenetically altered and transcriptionally up-regulated in multiple sclerosis
Source: PubMed Central journal article supplement (PMC5371344; doi:10.1371/journal.pone.0174726), 2017-03-29
Supplement: pone.0174726.s002.pdf [file pone.0174726.s002.pdf]

**S2 Fig. Gene Expression Omnibus (GEO) data analysis for *VDR* mRNA expression levels in Systemic Lupus Erythematosus (SLE).**

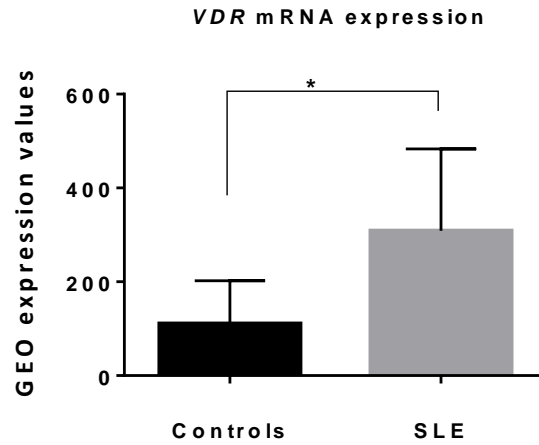

The bar chart represents *VDR* mRNA expression levels obtained from the GEO database for the Affymetrix Human Genome U133 Plus 2.0 Array performed on T cells from SLE patients and controls. \*p-value<0.05.
