# Supplementary material for: Vitamin D receptor gene is epigenetically altered and transcriptionally up-regulated in multiple sclerosis
Source: PubMed Central journal article supplement (PMC5371344; doi:10.1371/journal.pone.0174726), 2017-03-29
Supplement: pone.0174726.s003.pdf [file pone.0174726.s003.pdf]

**S1 Table. Bisulfite and RT-qPCR PCR primers**

| Identification | PCR Purpose   | Amplicon size | Tm    | Forward Primer            | Tm2   | Reverse Primer               | CpGs in amplicon |
|----------------|---------------|---------------|-------|---------------------------|-------|------------------------------|------------------|
| VDR_MP_bis     | Bisulfite PCR | 275 bp        | 59.29 | GTTGGGTTGTTTTGTTTGTAAA    | 58.8  | TCAAACCTCAATACCCCTTAATATC    | 23               |
| VDR_AP1c_bis   | Bisulfite PCR | 345 bp        | 57.39 | TTTAAAGGTTTTTGAAATGAAGAAG | 59.44 | CTCCCTCCTAACACCCTAAACTATAA   | 10               |
| VDR_q_1        | qPCR          | 128 bp        | 62.3  | GCTGGACGGAGAAATGGAC       | 62    | ACAGACACTTCAGACCCAAAG        | NA               |
| VDR_q_2        | qPCR          | 135 bp        | 62.2  | TTTGGGTCTGAAGTGTCTGTG     | 62.1  | GTTCCGGTCAAAGTCTCCAG         | NA               |
| VDR_AS_q       | qPCR          | 150 bp        | 61.7  | CCATTCACCCTCGTACCAC       | 62.2  | GTTCTCCATCCTTTTCAACA<br>CTTG | NA               |

The table shows the primer pairs used in the study. Amplified transcripts are identified by RefSeq Accession or GeneBank accession number.

qPCR: quantitative PCR; bp: base pair; Tm: Melting Temperature; NA: not applicable
