# Supplementary material for: Vitamin D receptor gene is epigenetically altered and transcriptionally up-regulated in multiple sclerosis
Source: PubMed Central journal article supplement (PMC5371344; doi:10.1371/journal.pone.0174726), 2017-03-29
Supplement: pone.0174726.s004.pdf [file pone.0174726.s004.pdf]

**S2 Table. Methylation levels for each CpG site in control and MS groups within VDR alternative promoter amplicon**

| <b>CpG position</b>                         | <b>46</b> | <b>51</b> | <b>58</b> | <b>87</b> | <b>172</b> | <b>195</b> | <b>226</b> | <b>257</b> | <b>263</b> | <b>298</b> | <b>Median</b> | <b>IQR</b> |
|---------------------------------------------|-----------|-----------|-----------|-----------|------------|------------|------------|------------|------------|------------|---------------|------------|
| <b>MR control group, average</b>            | 0.22      | 0.17      | 0.25      | 0.13      | 0          | 0.17       | 0.04       | 0.37       | 0.32       | 0.19       | 0.19          | 0.09       |
| <b>MR multiple sclerosis group, average</b> | 0.25      | 0.33      | 0.36      | 0.25      | 0.08       | 0.25       | 0.17       | 0.42       | 0.45       | 0.25       | 0.3           | 0.19       |
| <b>Gain in methylation, %</b>               | 3         | 16        | 11        | 12        | 8          | 8          | 13         | 5          | 13         | 6          | 11            | -          |
| <b>p-value</b>                              | 0.079     | 0.034     | 0.115     | 0.041     | 0.221      | 0.045      | 0.062      | 0.263      | 0.031      | 0.057      | 0.034         | -          |

Methylation ratio was calculated as the ratio of methylated CpGs over the total number of CpGs assessed. Gain in methylation was calculated as the subtraction of percentage of methylation between the AD group and control group. Mann-Whitney U-test was used to assess differences between control and AD groups. CpG position denotes the position of the dinucleotide CpG within the amplicon. MR: methylation ratio; MS: Multiple Sclerosis; IQR: interquartile range
