# Supplementary material for: Vitamin D receptor gene is epigenetically altered and transcriptionally up-regulated in multiple sclerosis
Source: PubMed Central journal article supplement (PMC5371344; doi:10.1371/journal.pone.0174726), 2017-03-29
Supplement: pone.0174726.s005.pdf [file pone.0174726.s005.pdf]

**S3 Table. Characteristics of patients depending on methylation levels of the *VDR 1c* alternative promoter (below versus above the median)**

| <b>Variables</b>                                         | <b>Methylation level &lt; 30.08%<br/>n=12</b> | <b>Methylation level &gt; 30.08%<br/>n=11</b> | <b>p- value</b> |
|----------------------------------------------------------|-----------------------------------------------|-----------------------------------------------|-----------------|
| Age, median (IQR)                                        | 45 (19)                                       | 33 (21)                                       | 0.151           |
| Gender, female %                                         | 58.3                                          | 63.6                                          | 0.795           |
| Smoking status, yes %                                    | 41.7                                          | 45.5                                          | 0.855           |
| Leukocyte count (N*10 <sup>9</sup> /L),<br>median (IQR)  | 6.95 (2.55)                                   | 6.4 (4.3)                                     | 0.786           |
| Lymphocyte count (N*10 <sup>9</sup> /L),<br>median (IQR) | 2.25 (1.9)                                    | 1.6 (1.3)                                     | 0.449           |
| 25(OH)D3 levels ng/mL,<br>median (IQR)                   | 19.5 (7.25)                                   | 24 (8)                                        | 0.079           |
| Evolution, median years (IQR)                            | 11.5 (14.5)                                   | 7 (6)                                         | 0.651           |
| EDSS ≤ 3, %                                              | 75                                            | 90.9                                          | 0.315           |
| Activity, %                                              | 25                                            | 9.1                                           | 0.315           |
| Progression, %                                           | 8.3                                           | 0                                             | 0.328           |
| Steroids, %                                              | 0                                             | 9.1                                           | 0.286           |
| IFN β, %                                                 | 33.3                                          | 63.6                                          | 0.146           |
| Glatimer acetate, %                                      | 8.3                                           | 0                                             | 0.328           |
| Fingolimod, %                                            | 8.3                                           | 9.1                                           | 0.949           |
| Natalizumab, %                                           | 50                                            | 18.2                                          | 0.110           |
